# Supplementary material
Source: PubMed Central journal article supplement (PMC7505135)
Supplement: ehp6391.s001.acco.pdf [file ehp6391.s001.acco.pdf]

**Note to readers with disabilities:** *EHP* strives to ensure that all journal content is accessible to all readers. However, some figures and Supplemental Material published in *EHP* articles may not conform to [508 standards](#) due to the complexity of the information being presented. If you need assistance accessing journal content, please contact [ehp508@niehs.nih.gov](mailto:ehp508@niehs.nih.gov). Our staff will work with you to assess and meet your accessibility needs within 3 working days.

### **Supplemental Material**

#### **Exposure to Manganese in Drinking Water during Childhood and Association with Attention-Deficit Hyperactivity Disorder: A Nationwide Cohort Study**

Jörg Schullehner, Malene Thygesen, Søren Munch Kristiansen, Birgitte Hansen, Carsten Bøcker Pedersen, and Søren Dalsgaard

#### **Table of Contents**

**Figure S1.** Cumulative distribution of manganese (Mn) concentrations in the study population (highest exposure to Mn). 19.2% of the study population did not exceed the analytical detection limit (5 µg/L).

**Video S1.** Complete spatiotemporal variations in concentrations of manganese (Mn) in drinking water across Denmark during the entire exposure period (January 1992 - December 2012). In total, 82 574 measurements are presented. Each dot represents a single public waterworks, and levels of Mn concentrations at these waterworks are shown in five color-coded categories, with higher concentrations in increasingly darker red colored dots and with the lowest concentrations as white dots (below the detection limit of 5 µg/L). Each time a drinking water sample was taken at the waterworks and analyzed for Mn, a black ring flashes at the location of the waterworks.

**Additional File-** Video and Audio file

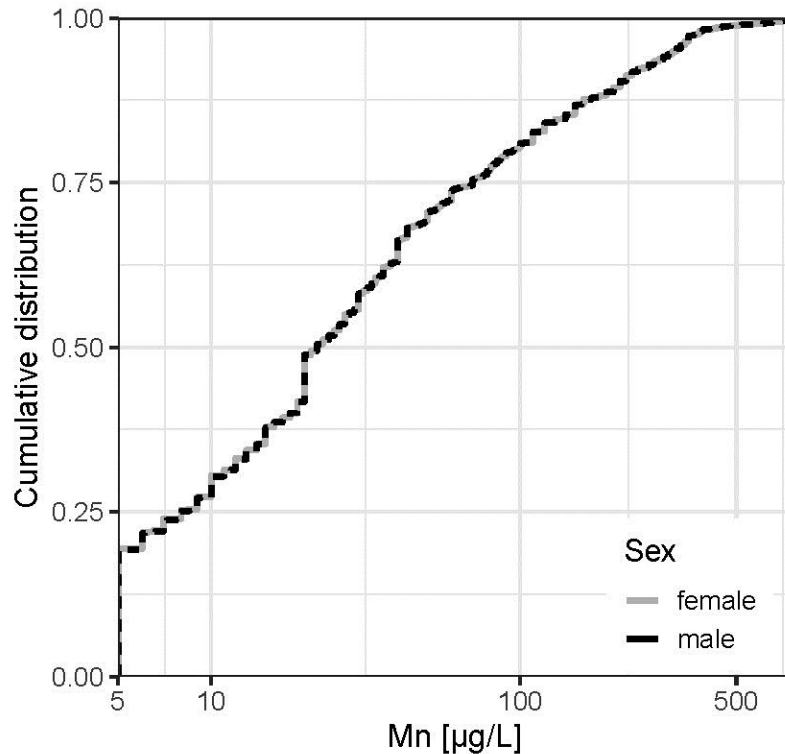

**Supplemental Figure S1:** Cumulative distribution of manganese (Mn) concentrations in the study population (highest exposure to Mn). 19.2% of the study population did not exceed the analytical detection limit (5 µg/L).

**Supplemental Video S1.** Complete spatiotemporal variations in concentrations of manganese (Mn) in drinking water across Denmark during the entire exposure period (January 1992 - December 2012). In total, 82 574 measurements are presented. Each dot represents a single public waterworks, and levels of Mn concentrations at these waterworks are shown in five color-coded categories, with higher concentrations in increasingly darker red colored dots and with the lowest concentrations as white dots (below the detection limit of 5 µg/L). Each time a drinking water sample was taken at the waterworks and analyzed for Mn, a black ring flashes at the location of the waterworks.
